# Supplementary material for: Characterization of a filovirus (Měnglà virus) from Rousettus bats in China
Source: Springer Nature journal article supplement (doi:10.1038/s41564-018-0328-y), 2018-12-20
Supplement: 41564_2018_328_MOESM1_ESM.pdf [file 41564_2018_328_MOESM1_ESM.pdf]

In the format provided by the authors and unedited.

# Characterization of a filovirus (Měnglà virus) from *Rousettus* bats in China

Xing-Lou Yang<sup>1,2,8</sup>, Chee Wah Tan<sup>2,8</sup>, Danielle E. Anderson<sup>2</sup>, Ren-Di Jiang<sup>1,3</sup>, Bei Li<sup>1</sup>, Wei Zhang<sup>1</sup>, Yan Zhu<sup>1</sup>, Xiao Fang Lim<sup>2</sup>, Peng Zhou<sup>1</sup>, Xiang-Ling Liu<sup>1</sup>, Wuxiang Guan<sup>1</sup>, Libiao Zhang<sup>4</sup>, Shi-Yue Li<sup>5</sup>, Yun-Zhi Zhang<sup>6,7</sup>, Lin-Fa Wang<sup>2\*</sup> and Zheng-Li Shi<sup>1\*</sup>

<sup>1</sup>CAS Key Laboratory of Special Pathogens, Wuhan Institute of Virology, Chinese Academy of Sciences, Wuhan, China. <sup>2</sup>Programme in Emerging Infectious Diseases, Duke-NUS Medical School, Singapore, Singapore. <sup>3</sup>University of Chinese Academy of Sciences, Beijing, China. <sup>4</sup>Guangdong Institute of Applied Biological Resources, Guangzhou, China. <sup>5</sup>Wuhan University, Wuhan, China. <sup>6</sup>Yunnan Institute of Endemic Diseases Control and Prevention, Dali, China. <sup>7</sup>Dali University, Dali, China. <sup>8</sup>These authors contributed equally: Xing-Lou Yang, Chee Wah Tan. \*e-mail: [linfa.wang@duke-nus.edu.sg](mailto:linfa.wang@duke-nus.edu.sg); [zlishi@wh.iov.cn](mailto:zlishi@wh.iov.cn)

1 **Characterization of a filovirus (Měnglǎ virus) from *Rousettus* bats in China**

2 **Running title:** Filovirus in *Rousettus* bats in China

3 **Key Words:** filovirus, *Rousettus*, bats, NPC1, cell tropism, zoonosis

4 Xing-Lou Yang<sup>1,2#</sup>, Chee Wah Tan<sup>2#</sup>, Danielle E. Anderson<sup>2</sup>, Ren-Di Jiang<sup>1,3</sup>, Bei Li<sup>1</sup>,

5 Wei Zhang<sup>1</sup>, Yan Zhu<sup>1</sup>, Xiao Fang Lim<sup>2</sup>, Peng Zhou<sup>1</sup>, Xiang-Ling Liu<sup>1</sup>, Wuxiang

6 Guan<sup>1</sup>, Libiao Zhang<sup>4</sup>, Shi-Yue Li<sup>5</sup>, Yun-Zhi Zhang<sup>6,7</sup>, Lin-Fa Wang<sup>2\*</sup> and Zheng-Li

7 Shi<sup>1\*</sup>,

8 **Author affiliations:**

9 <sup>1</sup> CAS Key Laboratory of Special Pathogens, Wuhan Institute of Virology, Chinese

10 Academy of Sciences, Wuhan 430071, China;

11 <sup>2</sup>Programme in Emerging Infectious Diseases, Duke-NUS Medical School, Singapore

12 169857, Singapore;

13 <sup>3</sup>University of Chinese Academy of Sciences, Beijing 101408, China;

14 <sup>4</sup>Guangdong Institute of Applied Biological Resources, Guangzhou 510260, China;

15 <sup>5</sup>Wuhan University, Wuhan, China;

16 <sup>6</sup>Yunnan Institute of Endemic Diseases Control and Prevention, Dali 671000, China;

17 <sup>7</sup>Dali University, Dali 671000, China;

18 # These authors contributed equally to this article.

19 \*e-mail and ORCID: zlshi@wh.iov.cn (ORCID 0000-0001-8089-163X);

20 linfa.wang@duke-nus.edu.sg (ORCID 0000-0003-2752-0535)

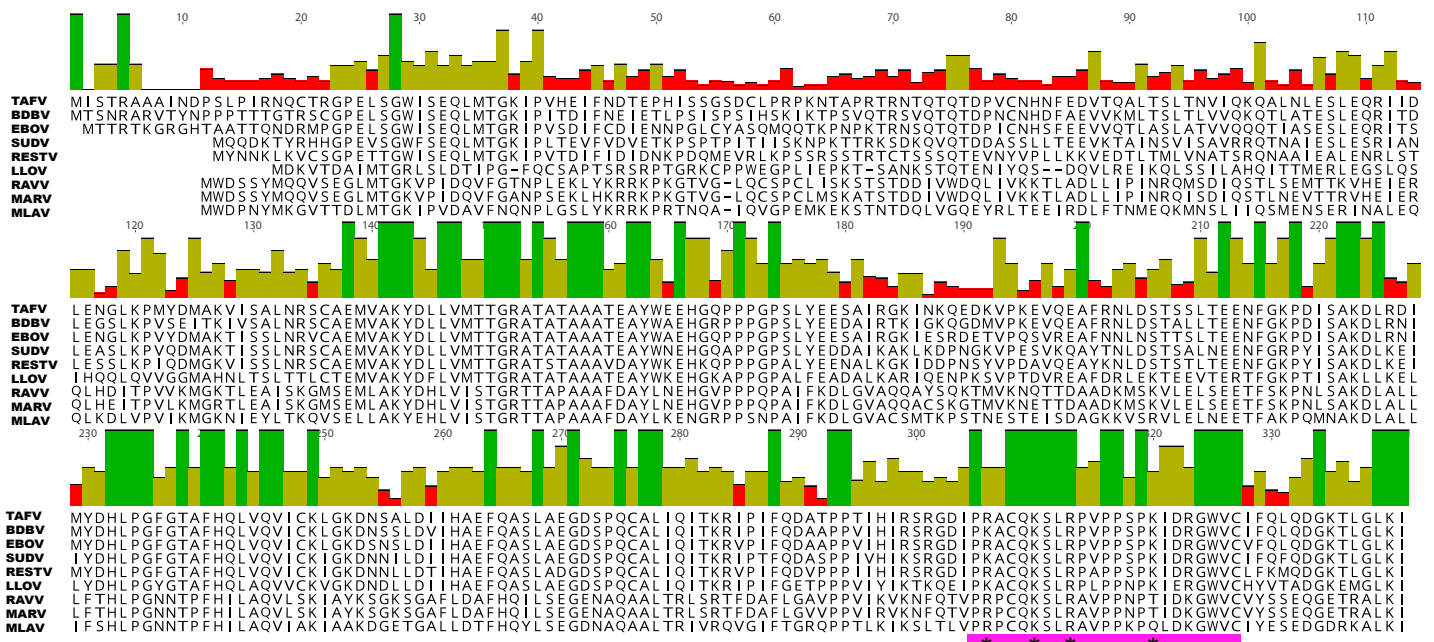

**Supplementary Figure 1| Comparison of amino acid sequence of VP35 of filoviruses.** Alignment results of VP35 using ClustalW in Geneious 10.0.2 (Biomatters, New Zealand). The identity (sliding window size of 1) lower than 29% is shown in red, 30%-99% in yellow, and 100% in green. Purple filled box indicate the basic amino acid motif for interferon antagonist, black asterisk indicate the conserved sites. GenBank accession numbers: NC014372 for TAFV; NC014373 for BDBV; NC002549 for EBOV; FJ968794 for SUDV; NC004161 for RESTV; NC016144 for LLOV; Z29337 for MARV; DQ447649 for RAVV.

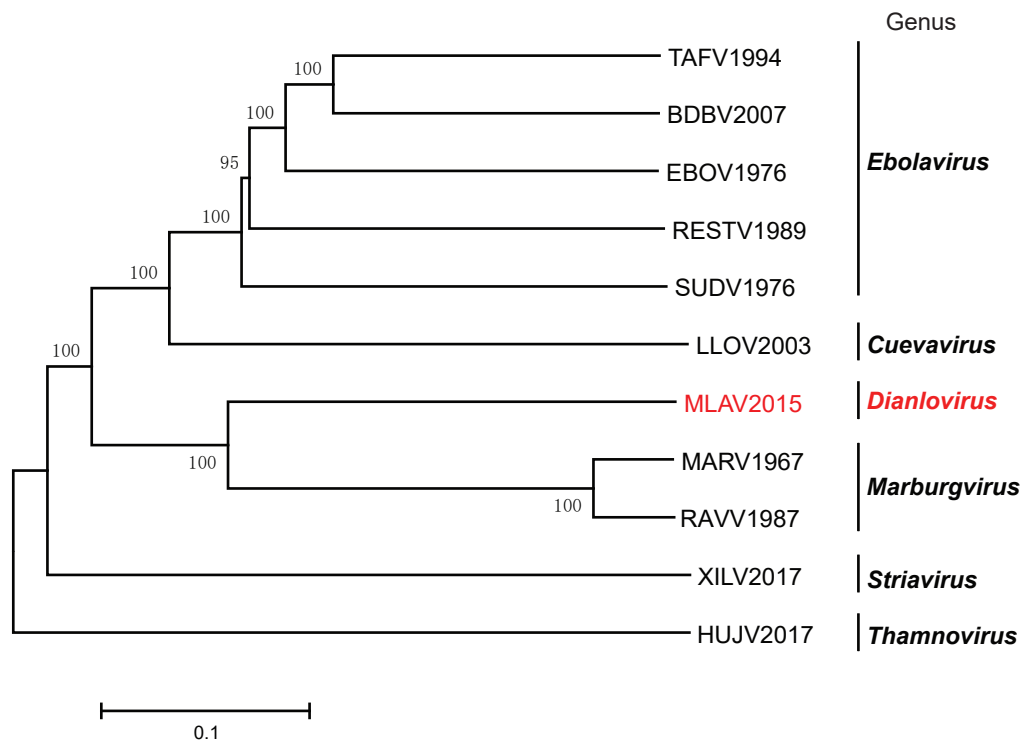

**Supplementary Figure 2| Phylogenetic tree of filoviruses based on genomic sequences.** The sequence alignment was performed using ClustalW in Geneious software 10.0.2. The phylogenetic tree was built using MEGA7 using the Neighbor-Joining method with p-distance model. The bootstrap value is 1000, and the scale bar represents the units of the number of base differences per site. The position of MALV is highlighted in red. GenBank accession numbers: NC014372 for TAFV1994; NC014373 for BDBV2007; NC002549 for EBOV1976; FJ968794 for SUDV1976; NC004161 for RESTV1989; NC016144 for LLOV2003; Z29337 for MARV1967; DQ447649 for RAVV1987; MG599980 for XILV2017; MG599981 for HUJV2017.

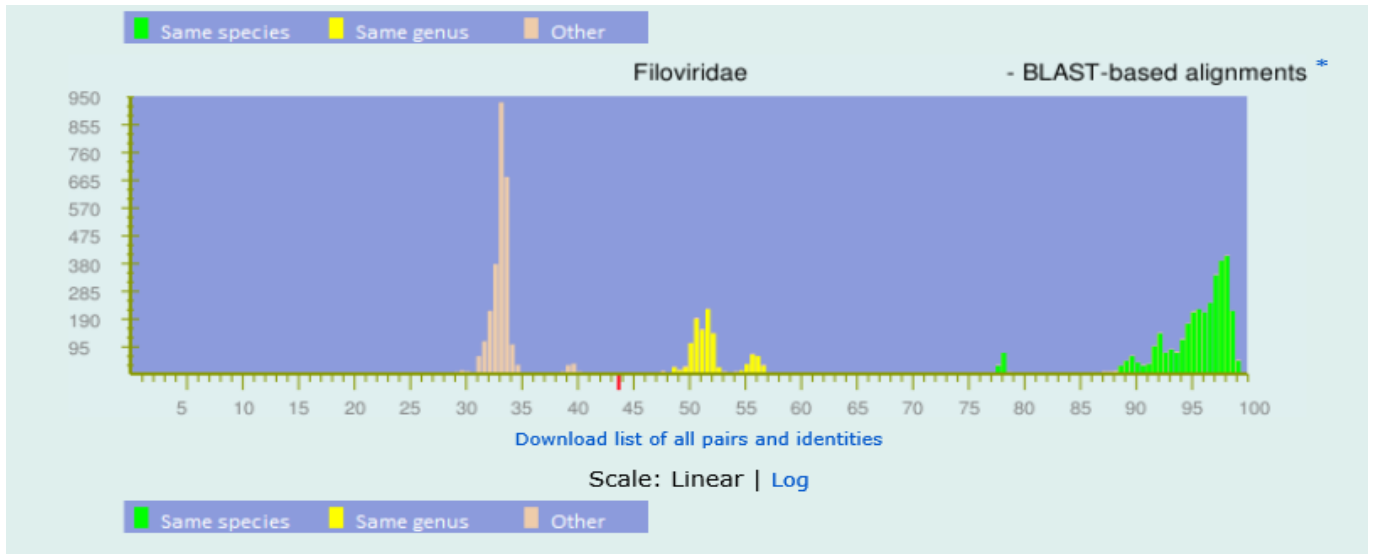

**Supplementary Figure 3| PASC analysis results of coding-complete genome sequence of MALV.** Pairwise Sequence Comparison (PASC) analysis was conducted using the online tool from the National Center for Biotechnology Information (NCBI; <https://www.ncbi.nlm.nih.gov/sutils/pasc/viridty.cgi>). Shown here is a screenshot of the results obtained for MALV. The red vertical line on identity ruler represents MALV shared 43.86% similarity with Marburgvirus (JN408064) from the BLAST-based alignments. Brown bars represent genome pairs assigned to (three) different genera; yellow bars represent genome pairs assigned to (seven) separate species; and green bars represent genome pairs assigned to the same species. BLAST: Basic Local Alignment.

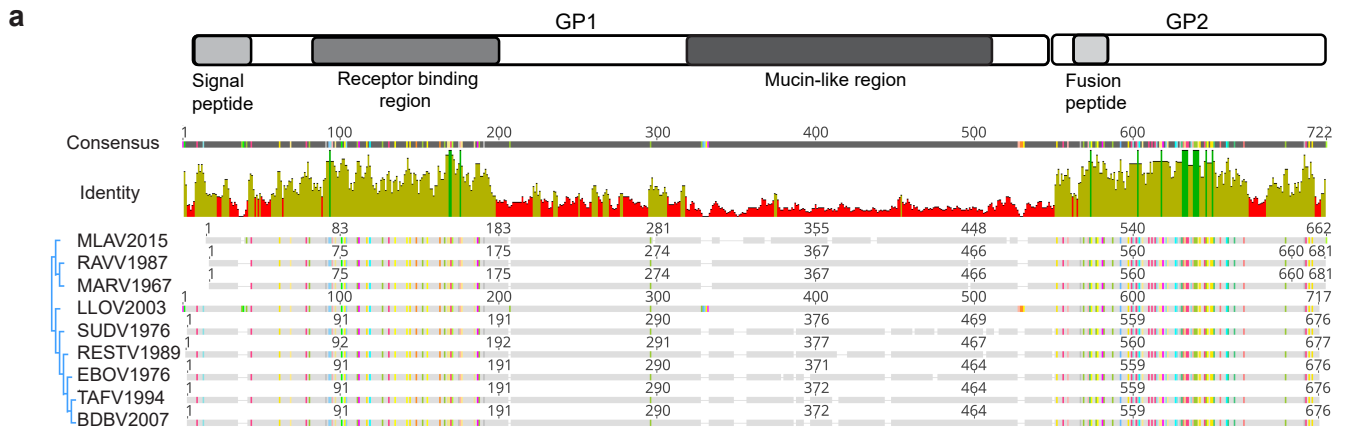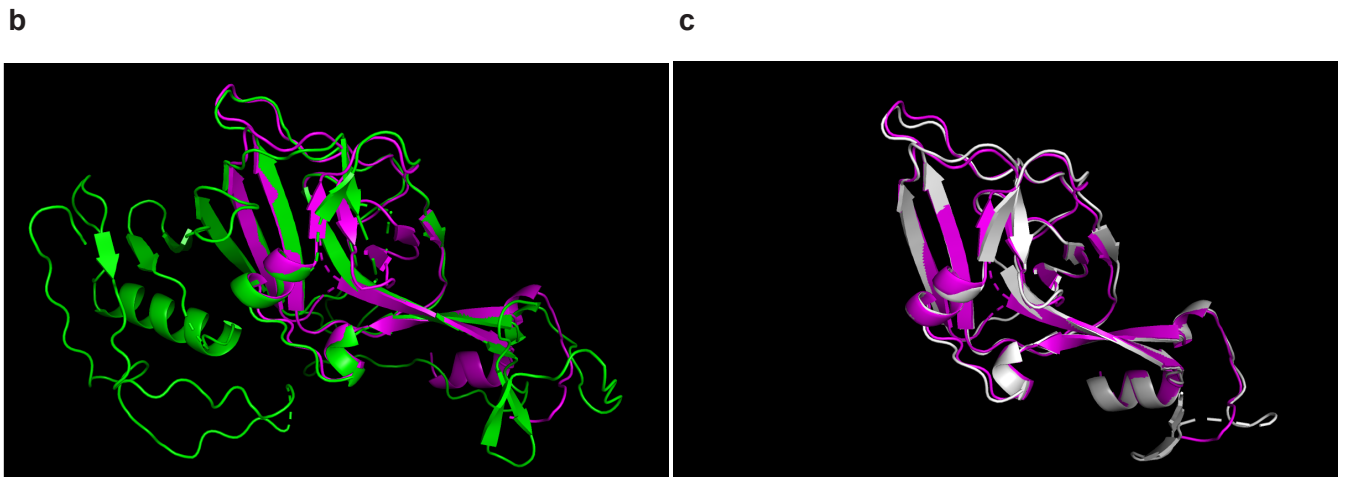

**Supplementary Figure 4| MLAV GP analysis based on predicted sequence and structure. a,** Alignment results of GPs using ClustalW. The identity (sliding window size of 3) lower than 29% is shown in red, 30%-99% in yellow, and 100% in green. The GP functional regions are indicated on top of the alignment. **b,** The predicted structure of receptor binding region for MLAV GP in comparison with that of EBOV GP (NP\_066246). The pink and green color represents MLAV and EBOV GP, respectively. **c,** The predicted structure of receptor binding region for MLAV GP in comparison with that of MARV GP (CAA82539). The pink and gray color represents MLAV and MARV GP, respectively. Structure prediction was conducted using CPHmodels3.2 (<http://www.cbs.dtu.dk/services/CPHmodels/>) and visualized using PyMOL 2.2.0 (<https://pymol.org/2/>).

a

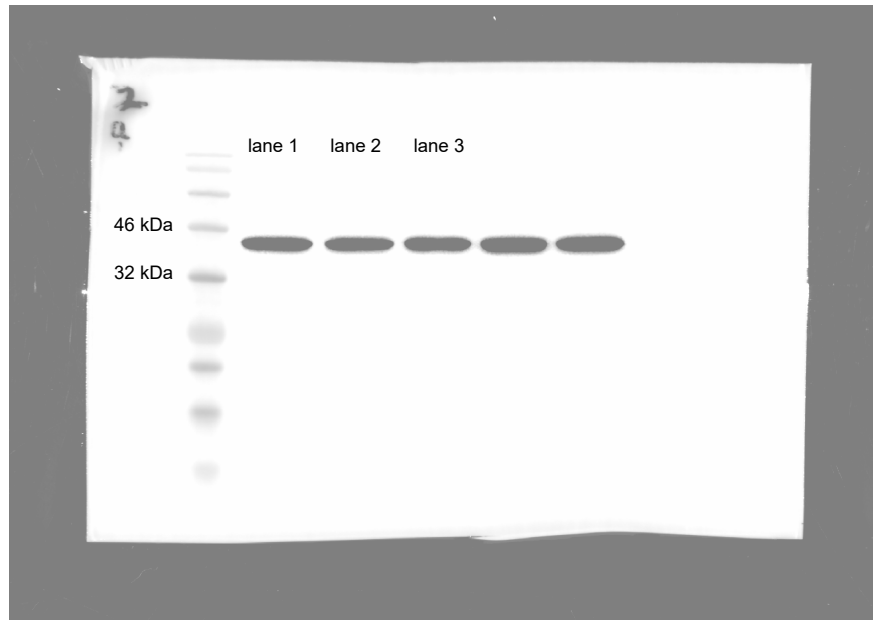

b

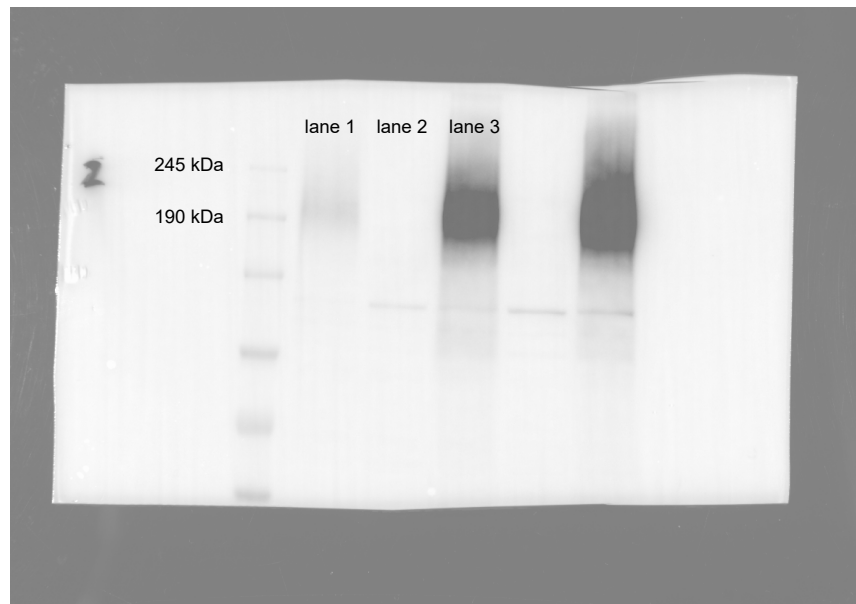

**Supplementary Figure 5 | Original blots of Figure 2b. a**, Western blot analysis of  $\beta$ -actin. **b**, Western blot analysis of NPC1. The size of molecular weight markers are shown. Lane 1, normal HEK293; lane 2, HEK293 $\Delta$ NPC1; lane 3, HEK293 $\Delta$ NPC1 with stably expressed hNPC1.

**Supplementary Table 1. Genome features of MLAV and gene comparison with other filoviruses**

| Gene                   | MLAV<br>ORF nt/aa | Percentage (%) sequence identity (nt/aa) |        |        |        |       |        |       |       |
|------------------------|-------------------|------------------------------------------|--------|--------|--------|-------|--------|-------|-------|
|                        |                   | TAFV                                     | BDBV   | EBOV   | SUDV   | RESTV | LLOV   | RAVV  | MARV  |
| Coding-complete genome | 18300/na          | 40/na                                    | 41/na  | 41/na  | 41/na  | 40/na | 39/na  | 54/na | 54/na |
| NP                     | 2094/697          | 45/35                                    | 45/ 35 | 45/ 36 | 45/35  | 44/34 | 43 /33 | 60/56 | 61/56 |
| VP35                   | 990/329           | 50/35                                    | 47/34  | 48/34  | 47/34  | 48/33 | 47/32  | 61/57 | 59/55 |
| VP40                   | 915/304           | 41/25                                    | 41/25  | 40/26  | 39/26  | 40/26 | 38/27  | 60/59 | 59/58 |
| GP                     | 1989/662          | 39/24                                    | 39/24  | 39/23  | 38/25  | 38/25 | 35/22  | 53/39 | 53/39 |
| VP30                   | 882/293           | 45/37                                    | 47/37  | 48/38  | 45/34  | 46/38 | 45/33  | 56/51 | 57/57 |
| VP24                   | 762/253           | 40/28                                    | 42/28  | 39/28  | 40/27  | 43/28 | 40/25  | 58/57 | 56/52 |
| L                      | 6831/2276         | 51/45                                    | 51/45  | 50 /46 | 50 /45 | 50/45 | 49/44  | 60/56 | 60/56 |

MLAV, Měngl à virus, KX371887; TAFV, Ta iforest virus, NC014372; BDBV, Bundibugyo virus, NC014373; EBOV, Ebola virus, NC002549; SUDV, Sudan virus, FJ968794; RESTV, Reston virus, NC004161; LLOV, Lloviu virus, NC016144; MARV, Marburg virus, Z29337; RAVV, Ravn virus, DQ447649



**Supplementary Table 2. Cell tropism of MLAV compared with EBOV and MARV.**

| Cell line | Host                         | Origin of cell line                   | Pseudotype susceptibility*         |         |         |        |
|-----------|------------------------------|---------------------------------------|------------------------------------|---------|---------|--------|
|           |                              |                                       | MLAV-GP                            | EBOV-GP | MARV-GP | VSV-GP |
| A549      | Human                        | <i>Homo sapiens</i> lung              | +                                  | ++      | +       | ++     |
| HeLa      |                              | <i>H. sapiens</i> cervix              | +                                  | ++      | +       | +      |
| HEK293    |                              | <i>H.sapiens</i> embryonic kidney     | +++                                | +++     | +++     | +++    |
| RIKi      | Bat**                        | <i>Rousettus leschenaultii</i> kidney | +++                                | +++     | +++     | +++    |
| MdKi      |                              | <i>Myotis davidii</i> kidney          | +                                  | +       | +       | +      |
| EsKi      |                              | <i>Eonycteris spelaea</i> kidney      | +                                  | +       | +       | +      |
| EsLu      |                              | <i>E. spelaea</i> lung                | +                                  | +       | +       | +      |
| EsIn      |                              | <i>E. spelaea</i> intestine           | ++                                 | ++      | +       | ++     |
| VeroE6    |                              | Monkey                                | <i>Chlorocebus aethiops</i> kidney | +++     | +++     | +++    |
| LLC-MK2   | <i>Macaca mulatta</i> kidney |                                       | ++                                 | +++     | +++     | +++    |
| MDCK      | Dog                          | <i>Canis familiaris</i> kidney        | ++                                 | +++     | ++      | +      |
| BHK21     | Hamster                      | <i>Mesocricetus auratus</i> kidney    | +++                                | +++     | +++     | +++    |

\* Efficiency of transduction is defined by GFP positive cell ratio; +, <5%; ++, between 5% and 10%; +++, >10% (3 independent experiments were repeated for all the cell lines). VSV-GP is included as a baseline control for comparison of relative susceptibility/efficiency of different cell lines using the VSV system.

\*\*All bat cell lines are primary cell line.
