# Supplementary material for: Characterization of a filovirus (Měnglà virus) from Rousettus bats in China
Source: Springer Nature journal article supplement (doi:10.1038/s41564-018-0328-y), 2018-12-20
Supplement: 41564_2018_328_MOESM2_ESM.pdf [file 41564_2018_328_MOESM2_ESM.pdf]

## Reporting Summary

Nature Research wishes to improve the reproducibility of the work that we publish. This form provides structure for consistency and transparency in reporting. For further information on Nature Research policies, see [Authors & Referees](#) and the [Editorial Policy Checklist](#).

### Statistical parameters

When statistical analyses are reported, confirm that the following items are present in the relevant location (e.g. figure legend, table legend, main text, or Methods section).

n/a Confirmed

- The exact sample size ( $n$ ) for each experimental group/condition, given as a discrete number and unit of measurement
- An indication of whether measurements were taken from distinct samples or whether the same sample was measured repeatedly
- The statistical test(s) used AND whether they are one- or two-sided  
*Only common tests should be described solely by name; describe more complex techniques in the Methods section.*
- A description of all covariates tested
- A description of any assumptions or corrections, such as tests of normality and adjustment for multiple comparisons
- A full description of the statistics including central tendency (e.g. means) or other basic estimates (e.g. regression coefficient) AND variation (e.g. standard deviation) or associated estimates of uncertainty (e.g. confidence intervals)
- For null hypothesis testing, the test statistic (e.g.  $F$ ,  $t$ ,  $r$ ) with confidence intervals, effect sizes, degrees of freedom and  $P$  value noted  
*Give  $P$  values as exact values whenever suitable.*
- For Bayesian analysis, information on the choice of priors and Markov chain Monte Carlo settings
- For hierarchical and complex designs, identification of the appropriate level for tests and full reporting of outcomes
- Estimates of effect sizes (e.g. Cohen's  $d$ , Pearson's  $r$ ), indicating how they were calculated
- Clearly defined error bars  
*State explicitly what error bars represent (e.g. SD, SE, CI)*

*Our web collection on [statistics for biologists](#) may be useful.*

### Software and code

Policy information about [availability of computer code](#)

Data collection

NA

Data analysis

GraphPad Prism 7, Geneious 10.0.2., MEGA7, Cytation 5

For manuscripts utilizing custom algorithms or software that are central to the research but not yet described in published literature, software must be made available to editors/reviewers upon request. We strongly encourage code deposition in a community repository (e.g. GitHub). See the Nature Research [guidelines for submitting code & software](#) for further information.

### Data

Policy information about [availability of data](#)

All manuscripts must include a [data availability statement](#). This statement should provide the following information, where applicable:

- Accession codes, unique identifiers, or web links for publicly available datasets
- A list of figures that have associated raw data
- A description of any restrictions on data availability

Data deposit code to be provided before publication

## Field-specific reporting

Please select the best fit for your research. If you are not sure, read the appropriate sections before making your selection.

Life sciences       Behavioural & social sciences       Ecological, evolutionary & environmental sciences

For a reference copy of the document with all sections, see [nature.com/authors/policies/ReportingSummary-flat.pdf](https://www.nature.com/authors/policies/ReportingSummary-flat.pdf)

## Life sciences study design

All studies must disclose on these points even when the disclosure is negative.

|                 |                                                                                         |
|-----------------|-----------------------------------------------------------------------------------------|
| Sample size     | NA                                                                                      |
| Data exclusions | NA                                                                                      |
| Replication     | For all results obtained from cell lines are repeated for three independent experiments |
| Randomization   | NA                                                                                      |
| Blinding        | NA                                                                                      |

## Reporting for specific materials, systems and methods

### Materials & experimental systems

| n/a                                 | Involvement in the study                                  |
|-------------------------------------|-----------------------------------------------------------|
| <input checked="" type="checkbox"/> | <input type="checkbox"/> Unique biological materials      |
| <input type="checkbox"/>            | <input checked="" type="checkbox"/> Antibodies            |
| <input type="checkbox"/>            | <input checked="" type="checkbox"/> Eukaryotic cell lines |
| <input checked="" type="checkbox"/> | <input type="checkbox"/> Palaeontology                    |
| <input checked="" type="checkbox"/> | <input type="checkbox"/> Animals and other organisms      |
| <input checked="" type="checkbox"/> | <input type="checkbox"/> Human research participants      |

### Methods

| n/a                                 | Involvement in the study                        |
|-------------------------------------|-------------------------------------------------|
| <input checked="" type="checkbox"/> | <input type="checkbox"/> ChIP-seq               |
| <input checked="" type="checkbox"/> | <input type="checkbox"/> Flow cytometry         |
| <input checked="" type="checkbox"/> | <input type="checkbox"/> MRI-based neuroimaging |

## Antibodies

### Antibodies used

Commercially available the primary and secondary antibodies were used in Western Blot

Anti-Niemann Pick C1 antibody  
Cat#: ab108921  
Host species: Rabbit  
Supplier: Abcam  
Dilution: 1:1,000

HRP-goat anti-mouse IgG  
Cat#:405306  
Host species: Goat  
Supplier: BioLegend  
Dilution: 1:10,000

Monoclonal anti-beta-actin antibody  
Cat#:A2228  
Host species: Mouse  
Supplier: Sigma  
Dilution: 1:10,000

Goat anti-rabbit IgG-HRP  
Cat#:sc-2357  
Host species: Goat  
Supplier: Santa Cruz biotechnology

Dilution: 1:10,000

## Validation

*Describe the validation of each primary antibody for the species and application, noting any validation statements on the manufacturer's website, relevant citations, antibody profiles in online databases, or data provided in the manuscript.*

## Eukaryotic cell lines

Policy information about [cell lines](#)

### Cell line source(s)

The primary bat cell lines were derived from *Myotis davidii* kidney (MdKi), *R. leschenaultii* kidney (RKi), *E. spelaea* kidney (EsKi), *E. spelaea* lung (EsLu), and *E. spelaea* intestine (EsIn). Human embryonic kidney fibroblast cells (HEK293, ATCC#CRL-1573), human cervix epithelial cells (HeLa, ATCC#CCL-2), human lung epithelial cells (A549, ATCC#CCL-185), African green monkey kidney cells (Vero, clone E6, ATCC#CRL-1586), Rhesus monkey kidney epithelial cells (LLC-MK2, ATCC#CCL-7), Madin-Darby Canine kidney cells (MDCK, ATCC#CRL-2935), baby hamster kidney cells (BHK21, ATCC#CCL-10), were obtained from ATCC.

### Authentication

All monkey and human cells were from ATCC with authentication. Bat cells made by ourselves were from organ. We guarantee they were from the organs described but there was no further authentication.

### Mycoplasma contamination

We confirm that all cells were tested as mycoplasma negative.

### Commonly misidentified lines (See [ICLAC](#) register)

None of the cell lines used are listed in the ICLAC database.
